# Supplementary material
Source: publisher figshare collection journal article supplement (https://acs.figshare.com/ndownloader/files/4171336)
Supplement: Supplementary file 1 [file 4171336]

# Azido-coated Nanoparticles: A Versatile Clickable Platform For The Preparation of Fluorescent Polystyrene Core-PAMAM Shell Nanoparticles

*Guillaume Rousseau, Hélène Fensterbank, Krystyna Baczko, Manuel Cano, Emmanuel  
Allard\* and Chantal Larpent*

Institut Lavoisier de Versailles UMR-CNRS 8180, Université de Versailles-Saint-Quentin-en-  
Yvelines, 45 avenue des Etats-Unis, 78035 Versailles cedex, France.

E-mail: [Emmanuel.Allard@chimie.uvsq.fr](mailto:Emmanuel.Allard@chimie.uvsq.fr)

## Tables of Contents

|                                                                                                                                                   | <b>Pages</b> |
|---------------------------------------------------------------------------------------------------------------------------------------------------|--------------|
| Figure S1. Structures and numbering of <b>2-(G<sub>0.5</sub>)</b> and <b>4-(G<sub>1.5</sub>)</b>                                                  | 3            |
| Synthesis of functionalized nanoparticles                                                                                                         | 3-4          |
| Table S1: Characterization of azide-functionalized nanoparticles                                                                                  | 5            |
| Table S2: Characterization of NP_PAMAM[CO <sub>2</sub> H] <sub>n</sub>                                                                            | 5            |
| Figure S2: AFM images of a set of NP-Dns-PAMAM[CO <sub>2</sub> H] <sub>8</sub>                                                                    | 6            |
| Figure S3: Absorption and fluorescence emission spectra of NP_Dns_PAMAM[CO <sub>2</sub> H] <sub>8</sub>                                           | 6            |
| Figure S4: Absorption spectra of NP_Dns_PAMAM[CO <sub>2</sub> H] <sub>4</sub> at different pH                                                     | 7            |
| Figure S5: Absorption spectra of NP_Dns_PAMAM[CO <sub>2</sub> H] <sub>8</sub> at different pH                                                     | 7            |
| Figure S6: Fluorescence spectra of NP_Dns_PAMAM[CO <sub>2</sub> H] <sub>4</sub> at different pH                                                   | 8            |
| Figure S7: Fluorescence spectra of NP_Dns_PAMAM[CO <sub>2</sub> H] <sub>8</sub> at different pH                                                   | 8            |
| Figure S8: Pictures depicting the colloidal stability of NP_PAMAM[CO <sub>2</sub> H] <sub>4</sub> versus pH                                       | 9            |
| Figure S9: Photographs of the switched forms of NP_PAMAM[CO <sub>2</sub> H] <sub>8</sub> in acidic and basic media.                               | 9            |
| Figure S10: Photographs of the switched forms of NP_PAMAM[CO <sub>2</sub> H] <sub>8</sub> in acidic and basic media after standing for two weeks. | 9            |
| Figure S11: Modeling of acid terminated PAMAM dendrons <b>2-(G<sub>0.5</sub>)</b> and <b>4-(G<sub>1.5</sub>)</b>                                  | 10           |

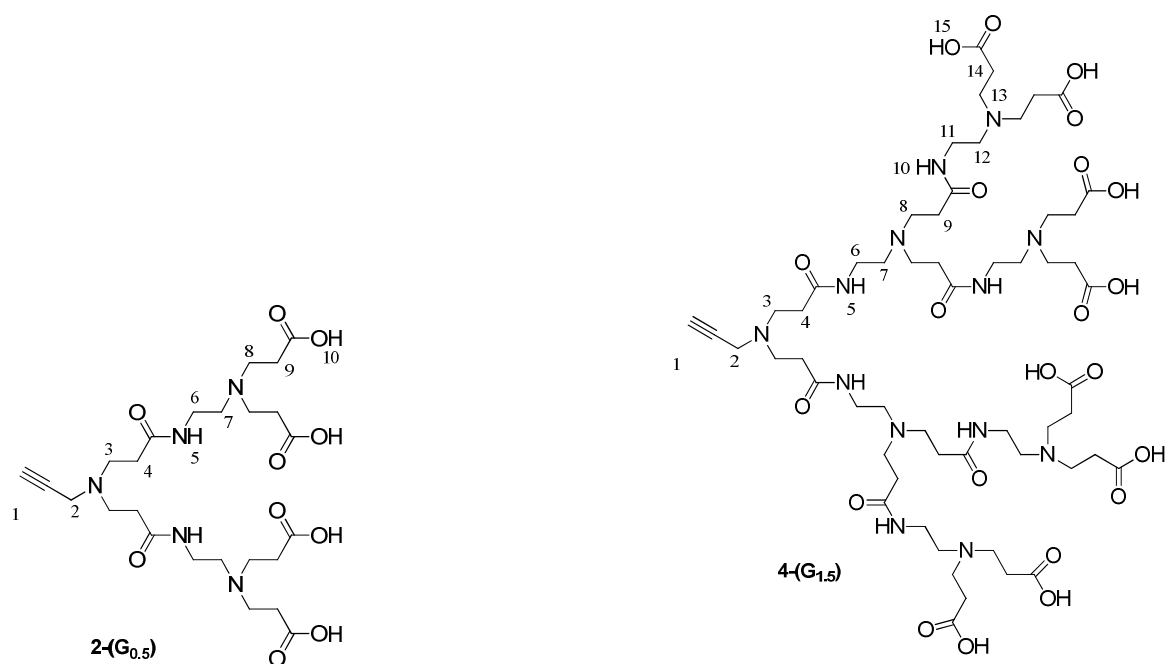

**Figure S1.** Structures and numbering of propargyl-functionalized acid terminated PAMAM dendrons **2-(G<sub>0.5</sub>)** and **4-(G<sub>1.5</sub>)** used for <sup>1</sup>H NMR signals assignments

### Synthesis of functionalized nanoparticles

**Materials** 2,2-dimethoxy-2-phenyl-acetophenone (DMPA, Acros, 99%) was used as received. Vinylbenzylchloride (VBCl, Aldrich, mixture of isomers *meta* (70%) and *para* (30%), 95%), and divinylbenzene (DVB, Fluka, mixture of isomers *meta* and *para*, 80%) were freed of inhibitors by passing through a LC-Si Solid Phase Extraction tube (Aldrich, cat. no. 57116 and 57133). Styrene (Acros, 99%) was distilled under reduced pressure.

**Synthesis of chorobenzyl-functionalized nanoparticles NP<sub>Cl</sub>** A microemulsion was prepared into a reactor by progressive addition, upon gentle magnetic stirring, of a mixture of monomers (styrene / divinylbenzene / vinylbenzylchloride: 3.50 g (33.6 mmol) / 4.51 g (34.7 mmol) / 1.84 g (12.1 mmol), respectively) and DMPA (333 mg, 1.3 mmol) to 220 g of a 15-wt % aqueous solution of DTAB. The resulting microemulsion was degassed with nitrogen for 30 min and the polymerization was then carried out under white light irradiation using two 60 W lamps at room temperature under nitrogen for 18 h. A stable translucent suspension was obtained. Chemical composition of the polymer particles: C, 85.45; H, 7.50; Cl, 1.88; Br, 2.56%. Mean diameter: 15 nm (PDI = 0.069).

### **Preparation and characterization of azide-functionalized nanoparticles NP<sub>N3</sub>**

**NP<sub>N3</sub>-bis** Azide-coated nanoparticles were prepared by adding an aqueous solution of sodium azide (7.66 g in 20 mL of water) to 210 g of the freshly prepared crude suspension of **NP<sub>Cl</sub>** the pH of which was previously adjusted to 7.5. The resulting suspension was stirred at room temperature for one week. The excess of sodium azide was then removed by dialysis through a porous cellulose membrane (MWCO 12000-14000D) toward an aqueous solution of DTAB (15 wt%) leading to a stable translucent aqueous suspension of azide-functionalized nanoparticles (NP<sub>N3</sub>). Polymer particle content in suspension is 4.36 wt%. Chemical composition: C, 84.71; H, 7.44; N, 1.65 % corresponding to an azide content of 0.39 mmol/g of polymer. Mean diameter (QELS): 16 nm (PDI: 0.036). IR (KBr): 3080, 3052, 3028, 2921, 2852, 2092, 1602, 1512, 1491, 1450, 1262, 1030, 988, 907, 837, 801, 760, 703, 543 cm<sup>-1</sup>.

### **Preparation and characterization of acide terminated PAMAM-functionalized nanoparticles NP\_PAMAM[CO<sub>2</sub>H]<sub>n</sub>**

**NP\_PAMAM[CO<sub>2</sub>H]<sub>4</sub>-bis** PAMAM derivative **2-(G<sub>0.5</sub>)** (113 mg, 0.198 mmol) was dissolved in 2 mL of water. The solution was added to 10 g of an aqueous suspension of azide-functionalized nanoparticles **NP<sub>N3</sub>-bis**. The pH was adjusted to 5.7 by adding NaOH (1M). Then, 2 mL of a freshly prepared aqueous solution of CuSO<sub>4</sub> (77 mg, 0.482 mmol) and sodium ascorbate (178 mg, 0.90 mmol) was added, the pH was again adjusted to 5.7. The resulting suspension was stirred at room temperature for 5 days. 116 mg of cyclam was added and then the suspension was dialyzed against aqueous solution of DTAB (15 wt% to 1 wt%). Polymer particle content in suspension is 8.5 wt%. Chemical composition: C, 81.00; H, 7.82; N, 2.67 % corresponding to a dendron content of 0.15 mmol/g of polymer. Mean diameter (QELS): 16 nm (PDI: 0.067). IR (KBr): 3419, 3080, 3056, 3024, 2923, 2851, 2096, 1653, 1600, 1492, 1451, 1374, 1266, 1182, 1029, 903, 837, 796, 760, 700, 535 cm<sup>-1</sup>.

**NP\_PAMAM[CO<sub>2</sub>H]<sub>8</sub>-bis** PAMAM derivative **4-(G<sub>1.5</sub>)** (220 mg, 0.167 mmol) was dissolved in 2 mL of water. The solution was added to 8.25 g of an aqueous suspension of azide-functionalized nanoparticles **NP<sub>N3</sub>-bis**. The pH was adjusted to 5.7 by adding NaOH (1M). Then, 2 mL of a freshly prepared aqueous solution of CuSO<sub>4</sub> (63 mg, 0.395 mmol) and sodium ascorbate (147 mg, 0.742 mmol) was added, the pH was again adjusted to 5.7. The resulting suspension was stirred at room temperature for 5 days. 96 mg of cyclam was added and then the suspension was dialyzed against aqueous solution of DTAB (15 wt% to 1 wt%). Polymer particle content in suspension is 4.1 wt%. Chemical composition: C, 81.48; H, 7.98; N, 3.14 % corresponding to a dendron content of 0.08 mmol/g of polymer. Mean diameter (QELS): 17 nm (PDI: 0.022). IR (KBr): 3405, 3082, 3057, 3024, 2922, 2851, 2096, 1653, 1600, 1492, 1451, 1374, 1266, 1182, 1029, 903, 832, 796, 760, 700, 539 cm<sup>-1</sup>.

**Table S1. Characterization of azido-coated nanoparticles NP<sub>N3</sub>**

| List                  | Starting suspension           | Reactant [x. eq.]     | %wt <sup>c</sup> | D (nm) [PDI] <sup>d</sup> | Azide content (meq/g polymer) <sup>e</sup> | n N <sub>3</sub> per NP <sup>f</sup> |
|-----------------------|-------------------------------|-----------------------|------------------|---------------------------|--------------------------------------------|--------------------------------------|
| NP <sub>N3</sub>      | NP <sub>Cl</sub> <sup>a</sup> | NaN <sub>3</sub> [10] | 4.46             | 18 [0.08]                 | 0.29                                       | 560                                  |
| NP <sub>N3</sub> -bis | NP <sub>Cl</sub> <sup>b</sup> | NaN <sub>3</sub> [10] | 4.36             | 16 [0.036]                | 0.39                                       | 530                                  |

<sup>a</sup> Chlorobenzyl content in the suspension = 1.04 mmol/g of polymer ; D = 18 nm (PDI = 0.083)

<sup>b</sup> Halobenzyl content in the suspension = 0.85 mmol/g of polymer ; D = 15 nm (PDI = 0.069)

<sup>c</sup> Polymer particle content in suspension

<sup>d</sup> Particle diameter determined from QELS

<sup>e</sup> Deduced from elemental analysis (nitrogen content)

<sup>f</sup> Calculated with the particle diameter obtained from QELS and a polymer density of 1.05

**Table S2. Characterization of acid terminated PAMAM-functionalized nanoparticles NP\_PAMAM[CO<sub>2</sub>H]<sub>n</sub>**

| List                                          | Starting Suspension   | Reactant [x. eq.]            | %wt <sup>a</sup> | D (nm) [PDI] <sup>b</sup>  | Dendron content (meq/g polymer) <sup>d</sup> |
|-----------------------------------------------|-----------------------|------------------------------|------------------|----------------------------|----------------------------------------------|
| NP_PAMAM[CO <sub>2</sub> H] <sub>4</sub> -bis | NP <sub>N3</sub> -bis | 2-(G <sub>0.5</sub> )<br>1.2 | 8.5              | 16 <sup>c</sup><br>[0.067] | 0.15<br>[40] <sup>e</sup>                    |
| NP_PAMAM[CO <sub>2</sub> H] <sub>8</sub> -bis | NP <sub>N3</sub> -bis | 4-(G <sub>1.5</sub> )<br>1.2 | 4.1              | 17 <sup>c</sup><br>[0.022] | 0.08<br>[20] <sup>e</sup>                    |

<sup>a</sup> Polymer particle content in suspension

<sup>b</sup> Particle diameter determined from QELS

<sup>c</sup> Suspension diluted 50 times in HCl 6.10<sup>-3</sup> M

<sup>d</sup> Deduced from elemental analysis (nitrogen content)

<sup>e</sup> In bracket estimation yield from elemental analysis (nitrogen content)

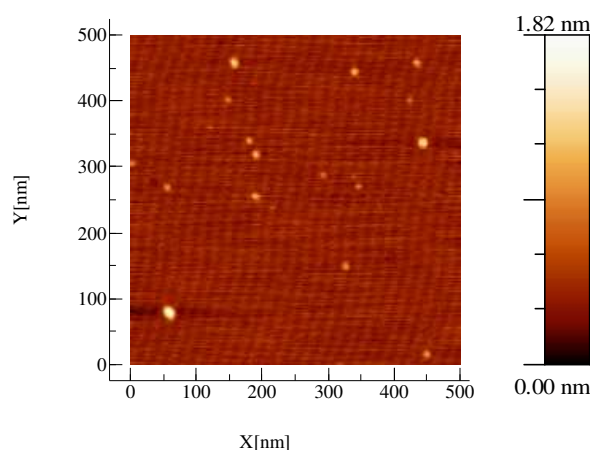

**Figure S2.** AFM images (amplitude) of a set of NP-Dns-PAMAM[CO<sub>2</sub>H]<sub>8</sub> using the tapping mode on mica substrates. The nanolatexes were diluted  $4 \times 10^4$  times in water (so that the final concentrations of nanoparticles and surfactant were respectively  $7.5 \times 10^{-5}$  g.L<sup>-1</sup> and  $2.5 \times 10^{-4}$  g.L<sup>-1</sup>).

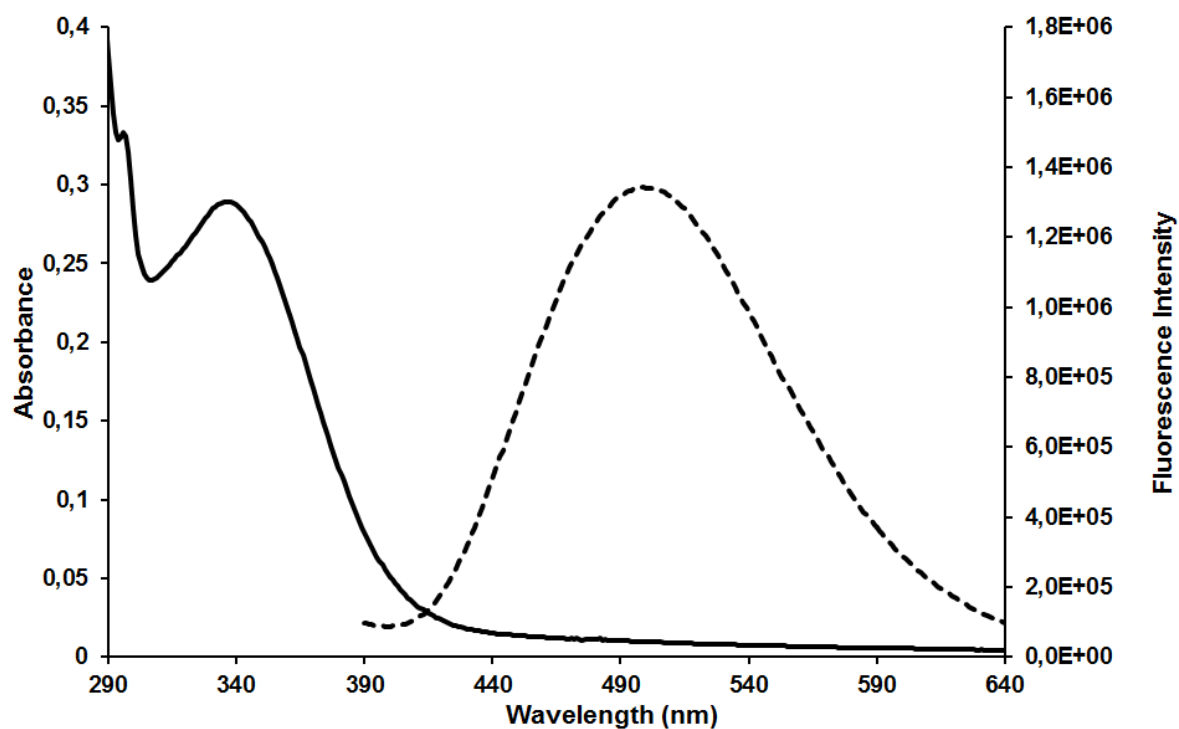

**Figure S3.** Absorption (Full, diluted 10 times, 0.5 wt% DTAB content) and fluorescence emission spectra (long-dash, diluted 160 times,  $\lambda_{exc} = 336$  nm, 0.03 wt% DTAB content) of aqueous suspension of NP\_Dns\_PAMAM[CO<sub>2</sub>H]<sub>8</sub>

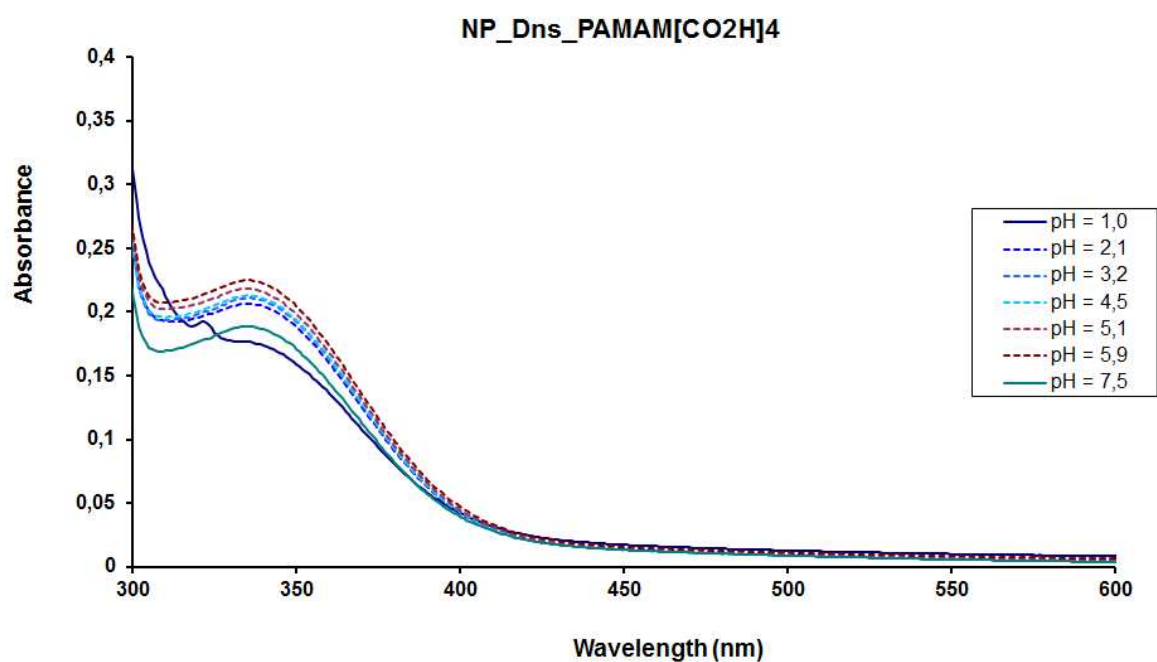

**Figure S4.** Absorption spectral changes of aqueous suspension of NP\_Dns\_PAMAM[CO<sub>2</sub>H]<sub>4</sub> with increasing pH values. Suspensions were diluted 7.5 times (0.7 wt% DTAB content).

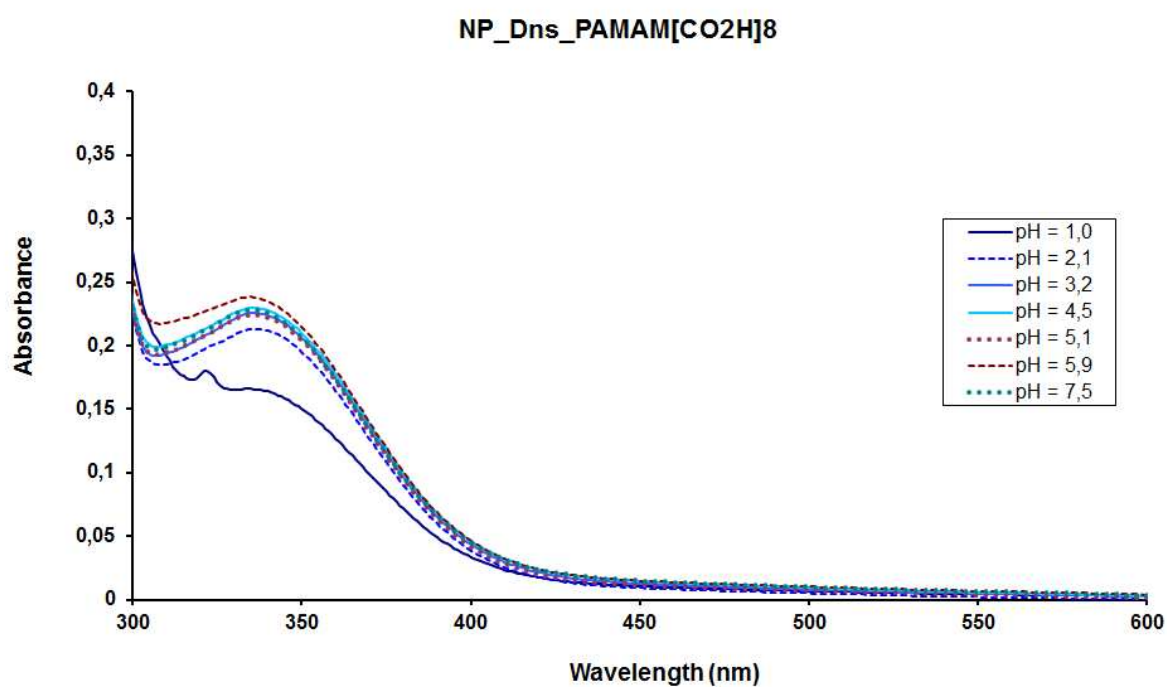

**Figure S5.** Absorption spectral changes of aqueous suspension of NP\_Dns\_PAMAM[CO<sub>2</sub>H]<sub>8</sub> with increasing pH values. Suspensions were diluted 15 times (0.35 wt% DTAB content).

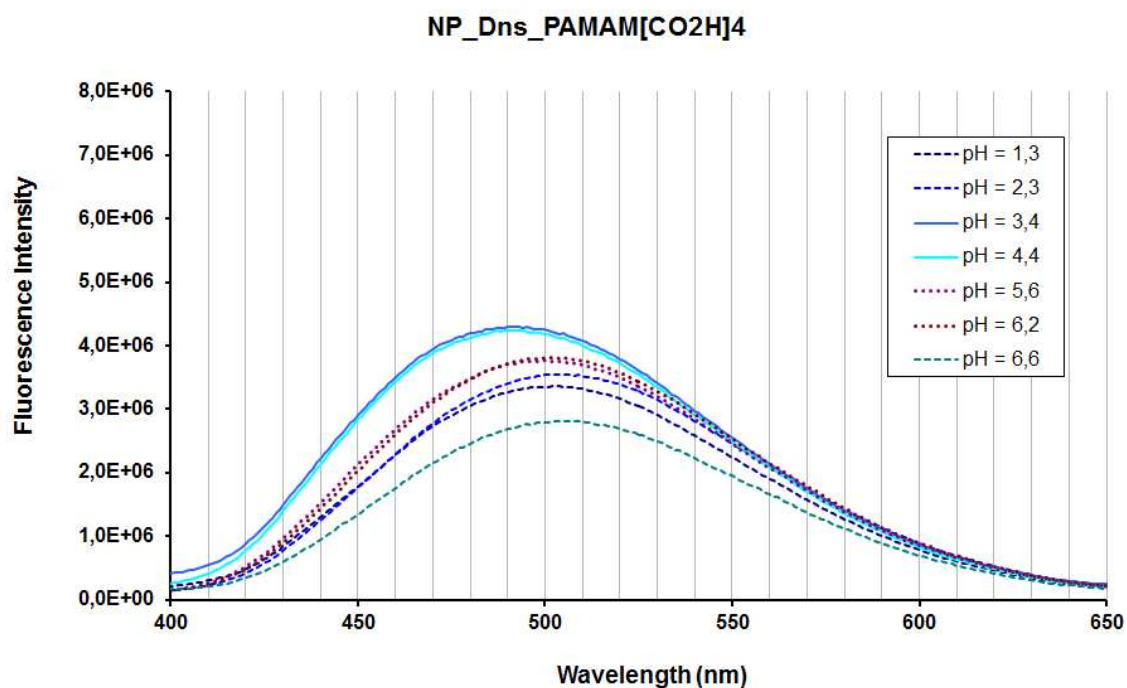

**Figure S6.** Fluorescence emission spectra of aqueous suspension of NP\_Dns\_PAMAM[CO<sub>2</sub>H]<sub>4</sub> for pH values ranging from 1.3 to 6.6. Suspensions were diluted 37.5 times (0.14 wt% DTAB content). Dansyl was excited at 335 nm.

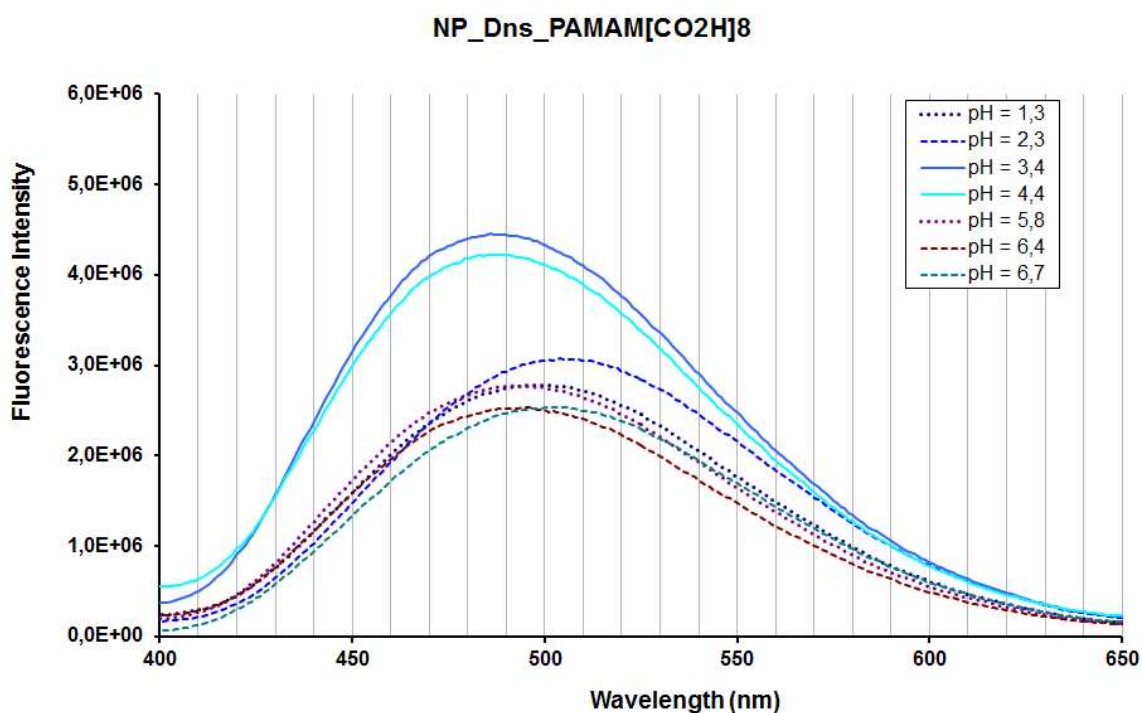

**Figure S7.** Fluorescence emission spectra of aqueous suspension of NP\_Dns\_PAMAM[CO<sub>2</sub>H]<sub>8</sub> for pH values ranging from 1.3 to 6.7. Suspensions were diluted 75 times (0.07 wt% DTAB content). Dansyl was excited at 335 nm.



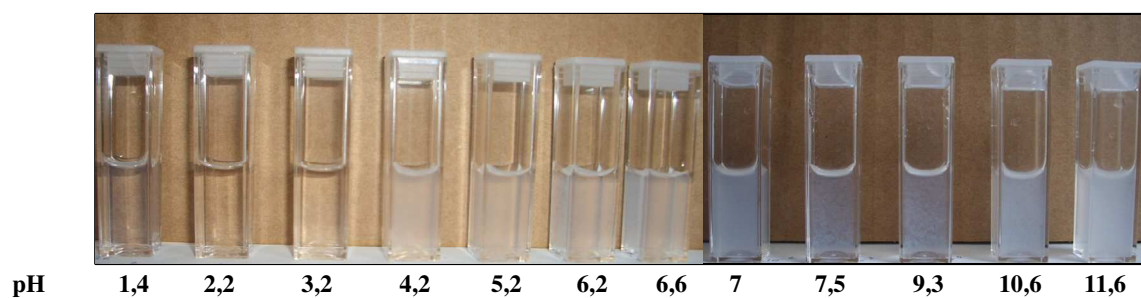

**Figure S8.** Pictures depicting the colloidal stability of NP\_PAMAM[CO<sub>2</sub>H]<sub>4</sub>-bis versus pH

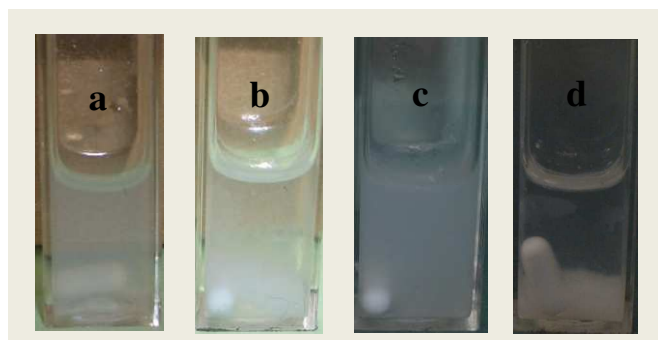

**Figure S9.** Photographs of NP\_PAMAM[CO<sub>2</sub>H]<sub>8</sub>-bis (0.02 wt% DTAB content) after standing 24h: from the starting suspension (initial pH 2.0) after the first sequence final pH 2.0 (a), solution from picture **a** after basification pH 12.0 (b), from the starting suspension after three sequences final pH 2.0 (c), solution from picture **c** after basification pH 12.0 (d).

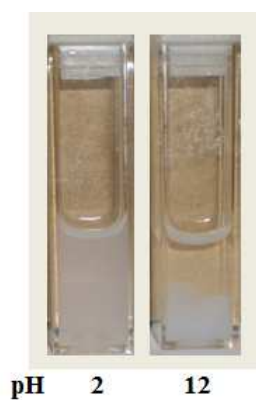

**Figure S10.** Photographs of the switched forms of NP\_PAMAM[CO<sub>2</sub>H]<sub>8</sub> in acidic and basic media after standing for two weeks.

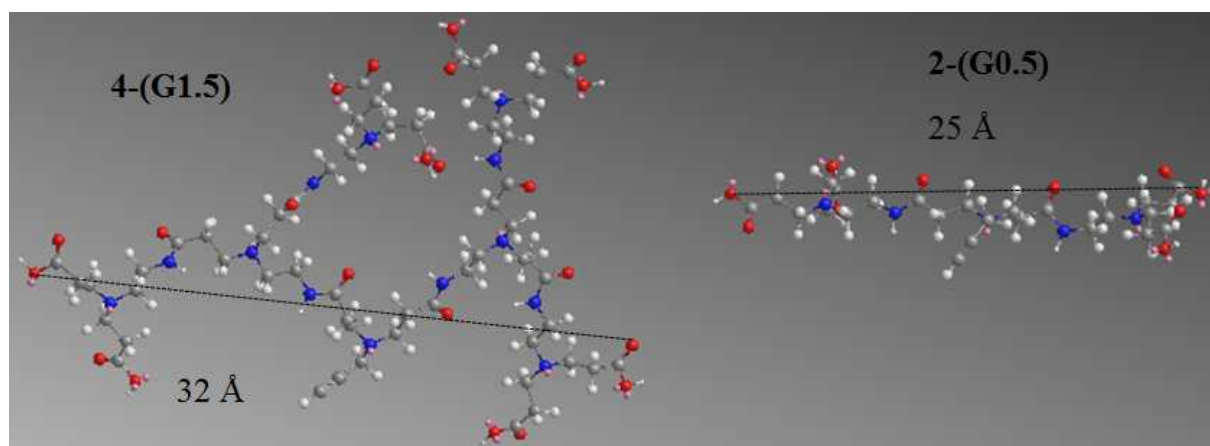

**Figure S11.** Estimation of the radius of propargyl-functionalized acid terminated PAMAM dendrons **2-(G<sub>0.5</sub>)** and **4-(G<sub>1.5</sub>)** using Chem Bio3D Ultra 11.0 (MM2 calculation) software.
